# Supplementary material
Source: PubMed Central journal article supplement (PMC1455417)
Supplement: cmaj_174_10_1421__1.pdf [file cmaj_174_10_1421__1.pdf]

**Appendix 1: Baseline characteristics of patients in the ASSENT-3 PLUS and ASSENT-3 trials, by treatment group**

| Characteristic                   | ASSENT-3 PLUS              |     |          |                            |     |          | ASSENT-3                    |     |          |                             |     |          |
|----------------------------------|----------------------------|-----|----------|----------------------------|-----|----------|-----------------------------|-----|----------|-----------------------------|-----|----------|
|                                  | Enoxaparin, <i>n</i> = 818 |     |          | UF heparin, <i>n</i> = 821 |     |          | Enoxaparin, <i>n</i> = 2040 |     |          | UF heparin, <i>n</i> = 2038 |     |          |
|                                  | No.                        | %*  | <i>n</i> | No.                        | %*  | <i>n</i> | No.                         | %*  | <i>n</i> | No.                         | %*  | <i>n</i> |
| Age, yr, mean (SD)               | 62 (13)                    |     |          | 62 (13)                    |     |          | 61 (12)                     |     |          | 61 (13)                     |     |          |
| Patients aged > 75 yr            | 149                        | 18  | 817      | 132                        | 16  | 820      | 263                         | 13  | 2040     | 271                         | 13  | 2038     |
| Women                            | 194                        | 24  | 818      | 184                        | 22  | 821      | 463                         | 23  | 2040     | 478                         | 23  | 2038     |
| Women aged > 75 yr               | 73                         | 38  | 193      | 56                         | 30  | 184      | 110                         | 24  | 463      | 129                         | 27  | 478      |
| Hypertension                     | 289                        | 35  | 815      | 298                        | 36  | 820      | 826                         | 41  | 2037     | 824                         | 41  | 2031     |
| Diabetes                         | 115                        | 14  | 816      | 128                        | 16  | 820      | 381                         | 19  | 2039     | 363                         | 18  | 2031     |
| Previous myocardial infarction   | 120                        | 15  | 816      | 117                        | 14  | 820      | 290                         | 14  | 2040     | 293                         | 14  | 2035     |
| Prior CABG                       | 21                         | 2.6 | 814      | 13                         | 1.6 | 819      | 73                          | 3.6 | 2038     | 53                          | 2.6 | 2029     |
| Prior PCI                        | 60                         | 7.4 | 806      | 52                         | 6.4 | 816      | 126                         | 6.2 | 2019     | 128                         | 6.4 | 2012     |
| Current smoker                   | 336                        | 42  | 801      | 365                        | 45  | 809      | 884                         | 44  | 1992     | 930                         | 47  | 1988     |
| Infarct location                 |                            |     |          |                            |     |          |                             |     |          |                             |     |          |
| Anterior                         | 341                        | 42  | 813      | 350                        | 43  | 820      | 802                         | 39  | 2040     | 772                         | 38  | 2037     |
| Inferior                         | 439                        | 54  | 813      | 444                        | 54  | 820      | 1144                        | 56  | 2040     | 1164                        | 57  | 2037     |
| Other                            | 33                         | 4.0 | 813      | 26                         | 3.2 | 820      | 94                          | 4.6 | 2040     | 101                         | 5.0 | 2037     |
| Heart rate, beats/min, mean (SD) | 74 (19)                    |     |          | 74 (19)                    |     |          | 75 (17)                     |     |          | 74 (17)                     |     |          |
| Systolic BP, mm Hg, mean (SD)    | 134 (25)                   |     |          | 132 (25)                   |     |          | 134 (22)                    |     |          | 133 (23)                    |     |          |
| Killip class †                   | 593                        | 92  | 642      | 603                        | 92  | 654      | 1823                        | 89  | 2039     | 1786                        | 88  | 2033     |

Note: ASSENT = Assessment of the Safety and Efficacy of a New Thrombolytic Agent, UF = unfractionated, SD = standard deviation, CABG = coronary artery bypass graft, PCI = percutaneous coronary intervention, BP = blood pressure.

\*Unless indicated otherwise.

†Killip class was unrecorded in the records of 21% of ASSENT-3 PLUS patients.
