# Supplementary material
Source: PubMed Central journal article supplement (PMC1455417)
Supplement: cmaj_174_10_1421__2.pdf [file cmaj_174_10_1421__2.pdf]

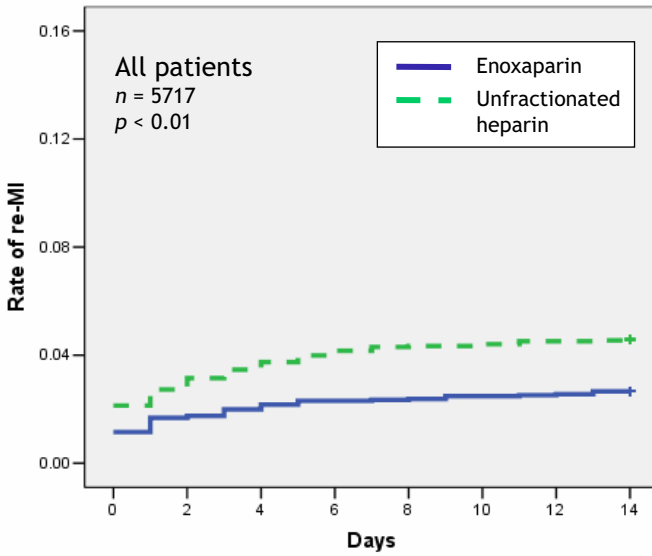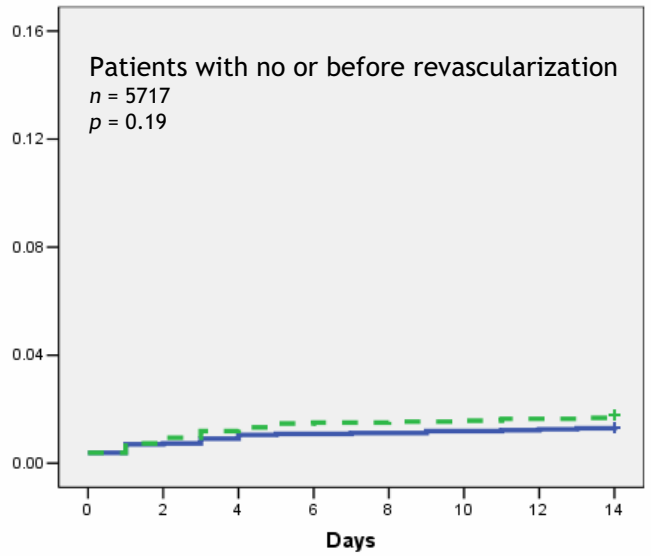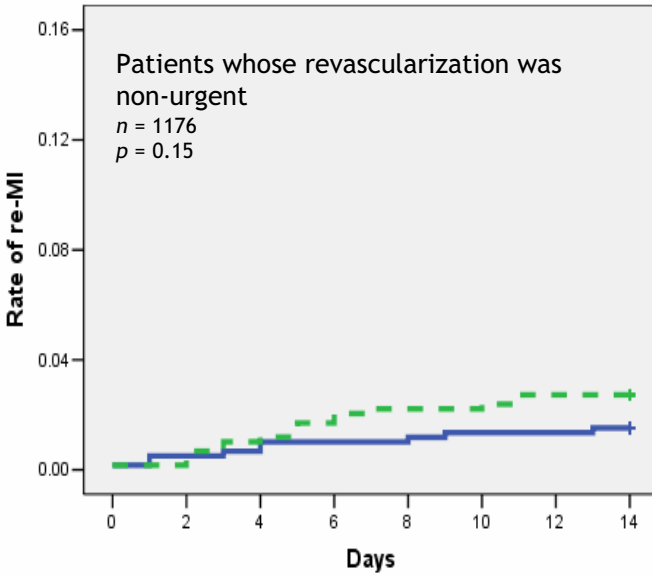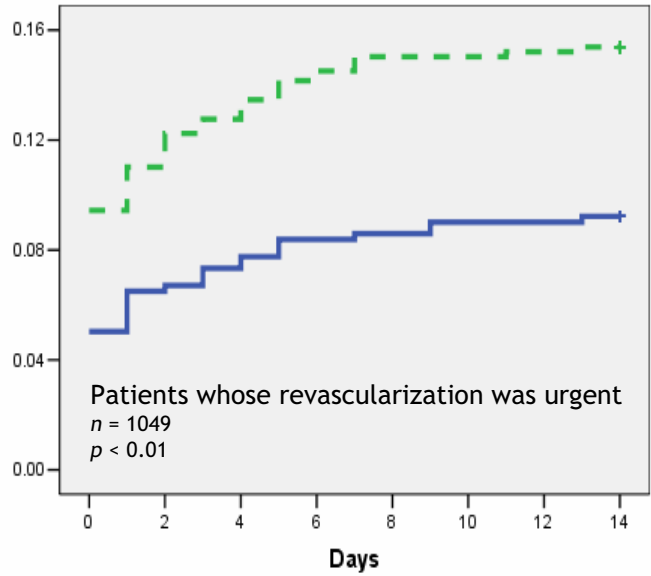

**Appendix 2:** Kaplan–Meier curves for myocardial reinfarction (re-MI) according to patients’ revascularization status. The  $p$  values are based on log–rank tests.
